# Supplementary material
Source: PubMed Central journal article supplement (PMC7669634)
Supplement: NIHMS1610934-supplement-1.pdf [file NIHMS1610934-supplement-1.pdf]

**Figure S1:** Study population at baseline Visit 4 (1996-1998), the Atherosclerosis Risk in Communities (ARIC) Study cohort.

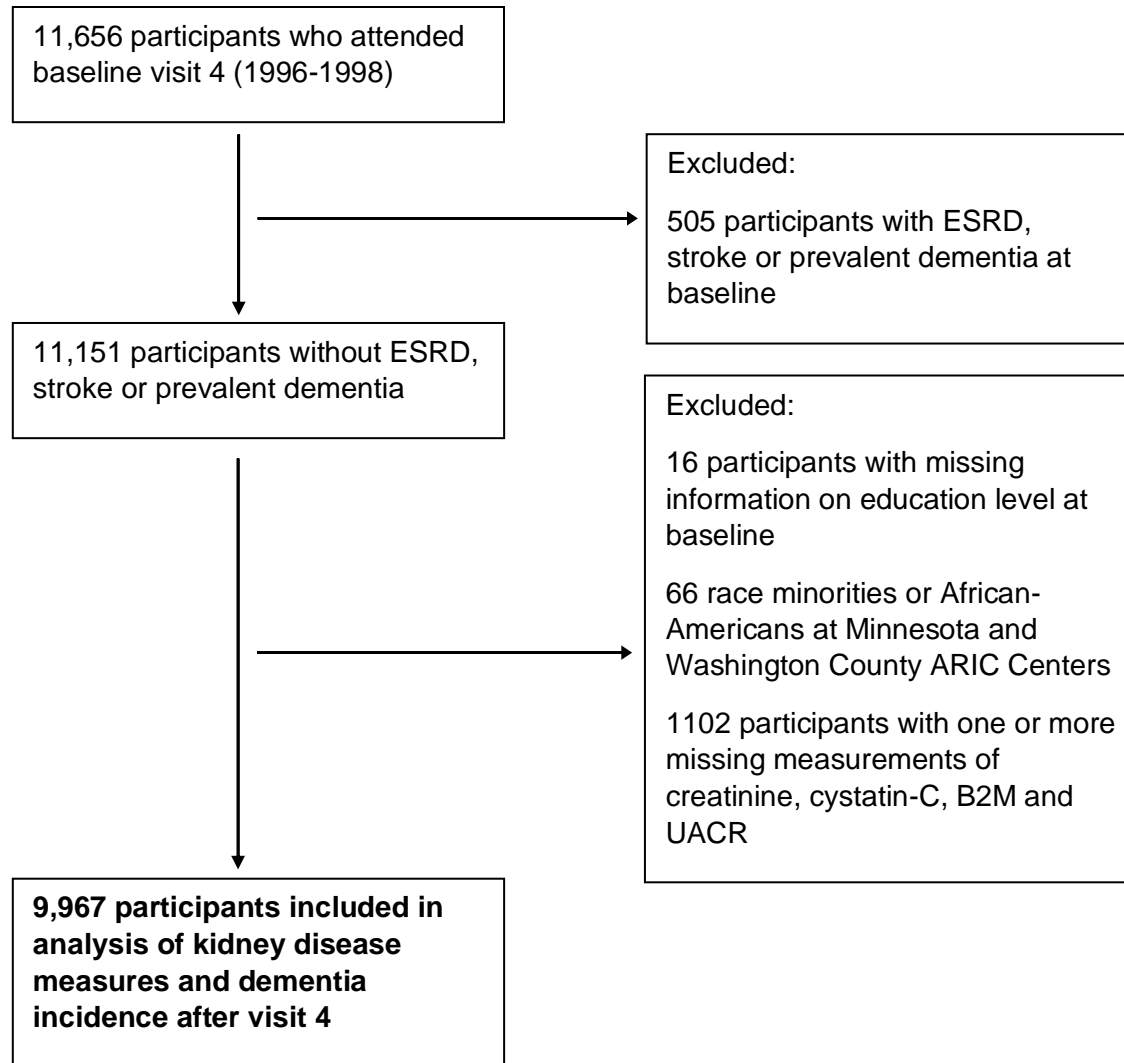

**Figure S2:** Study population at baseline Visit 5 (2011-2013), the Atherosclerosis Risk in Communities (ARIC) Study cohort

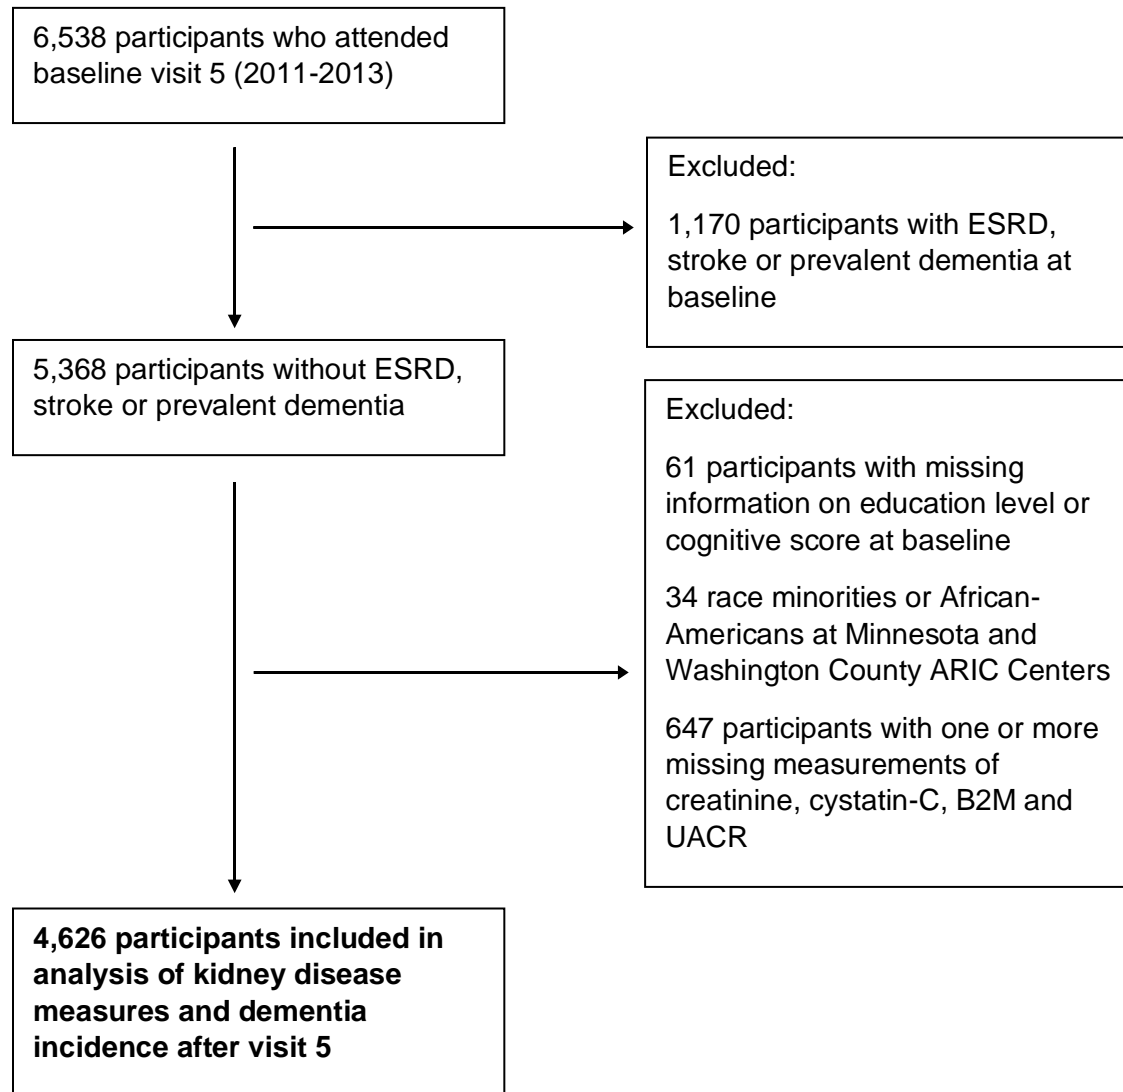

**Figure S3:** Adjusted relative hazards (95%-CI) of dementia incidence after midlife (baseline visit 4, ages 54-74 years during 1996-1998) and after older age (baseline visit 5, ages 70-90 years during 2011-2013), by eGFR (creatinine) and UACR categories, the Atherosclerosis Risk in Communities (ARIC) Study cohort.

| Incident dementia after visit 4<br>eGFR CKD-EPI, Creatinine (ml/min) | UACR categories (mg/g)      |                                       |                                     |
|----------------------------------------------------------------------|-----------------------------|---------------------------------------|-------------------------------------|
|                                                                      | < 10                        | 10 – 30                               | > 30                                |
| ≥ 60                                                                 | reference<br>(n=7,699)      | 1.11 (0.95–1.30)<br>(n=1,116)         | <b>1.40 (1.16–1.69)*</b><br>(n=609) |
| < 60                                                                 | 1.07 (0.85–1.34)<br>(n=370) | 1.01 (0.58–1.76)<br>(n=70)            | <b>1.97 (1.30–2.99)*</b><br>(n=103) |
| Incident dementia after visit 5<br>eGFR CKD-EPI, Creatinine (ml/min) |                             |                                       |                                     |
| ≥ 60                                                                 | reference<br>(n=1,700)      | <b>1.37 (1.00–1.87)*</b><br>(n=1,134) | <b>1.69 (1.17–2.45)*</b><br>(n=496) |
| < 60                                                                 | 0.99 (0.66–1.50)<br>(n=548) | <b>1.68 (1.15–2.47)*</b><br>(n=384)   | <b>2.16 (1.49–3.15)*</b><br>(n=364) |

Models adjusted for age, sex, race, education level, Apolipoprotein E4 level, smoking, body mass index, diabetes and antihypertensive medication.

\*p < 0.05

**Figure S4:** Adjusted relative hazards (95%-CI) of dementia incidence after midlife (baseline visit 4, ages 54-74 years during 1996-1998) and after older age (baseline visit 5, ages 70-90 years during 2011-2013), by eGFR (creatinine + cystatin-C) and UACR categories, the Atherosclerosis Risk in Communities (ARIC) Study cohort.

| Incident dementia after visit 4<br>eGFR CKD-EPI,<br>Creatinine and Cystatin-C (ml/min) | UACR categories (mg/g)      |                                     |                                     |
|----------------------------------------------------------------------------------------|-----------------------------|-------------------------------------|-------------------------------------|
|                                                                                        | < 10                        | 10 – 30                             | > 30                                |
| ≥ 60                                                                                   | reference<br>(n=7,664)      | 1.10 (0.94–1.29)<br>(n=1,095)       | <b>1.38 (1.14–1.67)*</b><br>(n=591) |
| < 60                                                                                   | 1.15 (0.91–1.46)<br>(n=405) | 1.25 (0.76–2.05)<br>(n=91)          | <b>2.13 (1.43–3.18)*</b><br>(n=121) |
| Incident dementia after visit 5<br>eGFR CKD-EPI,<br>Creatinine and Cystatin-C (ml/min) |                             |                                     |                                     |
| ≥ 60                                                                                   | reference<br>(n=1,550)      | <b>1.43 (1.01–2.01)*</b><br>(n=981) | <b>1.79 (1.18–2.71)*</b><br>(n=396) |
| < 60                                                                                   | 1.21 (0.82–1.78)<br>(n=698) | <b>1.82 (1.26–2.62)*</b><br>(n=537) | <b>2.26 (1.56–3.29)*</b><br>(n=464) |

Models adjusted for age, sex, race, education level, Apolipoprotein E4 level, smoking, body mass index, diabetes and antihypertensive medication.

\*p < 0.05

**Figure S5:** Adjusted relative hazards (95%-CI) of dementia incidence after midlife (baseline visit 4, ages 54-74 years during 1996-1998) and after older age (baseline visit 5, ages 70-90 years during 2011-2013), by eGFR (B2M) and UACR categories, the Atherosclerosis Risk in Communities (ARIC) Study cohort.

| Incident dementia after visit 4<br>eGFR CKD-EPI,<br>Beta-2-microglobulin (ml/min) | UACR categories (mg/g)              |                                     |                                     |
|-----------------------------------------------------------------------------------|-------------------------------------|-------------------------------------|-------------------------------------|
|                                                                                   | < 10                                | 10 – 30                             | > 30                                |
| ≥ 60                                                                              | reference<br>(n=7,216)              | 1.06 (0.90–1.25)<br>(n=999)         | <b>1.36 (1.11–1.68)*</b><br>(n=493) |
| < 60                                                                              | <b>1.18 (1.00–1.39)*</b><br>(n=853) | <b>1.65 (1.15–2.35)*</b><br>(n=187) | <b>1.89 (1.40–2.57)*</b><br>(n=219) |
| Incident dementia after visit 5<br>eGFR CKD-EPI,<br>Beta-2-microglobulin (ml/min) |                                     |                                     |                                     |
| ≥ 60                                                                              | reference<br>(n=1,502)              | 1.33 (0.94–1.87)<br>(n=950)         | 1.34 (0.84–2.12)<br>(n=356)         |
| < 60                                                                              | 1.08 (0.74–1.59)<br>(n=746)         | <b>1.84 (1.27–2.65)*</b><br>(n=568) | <b>2.40 (1.67–3.45)*</b><br>(n=504) |

Models adjusted for age, sex, race, education level, Apolipoprotein E4 level, smoking, body mass index, diabetes, antihypertensive medication and CRP.

\***p < 0.05**

**Table S1:** Number of diagnosed incident dementia events after midlife (baseline visit 4, ages 54-74 years during 1996-1998) and after older age (baseline visit 5, ages 70-90 years during 2011-2013), by ascertainment levels, the Atherosclerosis Risk in Communities (ARIC) Study cohort.

| <b>Ascertainment level</b>                   | <b>Level 1</b> | <b>Level 2</b> | <b>Level 3</b> |
|----------------------------------------------|----------------|----------------|----------------|
| <b>Events after visit 4, age 54-74 years</b> | <b>458</b>     | <b>1289</b>    | <b>1821</b>    |
| <b>Events after visit 5, age 70-90 years</b> | <b>143</b>     | <b>322</b>     | <b>438</b>     |

Dementia ascertainment Level 1: in-person cognitive assessment and/or in-person informant interview.

Dementia ascertainment Level 2: All cases from level 1 with additional diagnoses based on telephone interviews.

Dementia ascertainment Level 3: All cases from levels 1 and 2 with additional diagnoses based on hospital records.

**Table S2:** Characteristics of the study population at baseline visit 4 (1996-1998) stratified by eGFR (cystatin-C) categories, the Atherosclerosis Risk in Communities (ARIC) Study cohort.

| Participants                    | Complete cohort<br>N = 9967 | eGFR (Cystatin-C) categories (ml/min) |                        |                       |                       |                  |
|---------------------------------|-----------------------------|---------------------------------------|------------------------|-----------------------|-----------------------|------------------|
|                                 |                             | eGFR ≥ 90<br>4000                     | 90 > eGFR ≥ 60<br>5059 | 60 > eGFR ≥ 45<br>629 | 45 > eGFR ≥ 30<br>134 | 30 > eGFR<br>145 |
| <b>Age, years, mean (SD)</b>    | 62.8 (5.7)                  | 60.6 (5.1)                            | 63.9 (5.5)             | 66.7 (5.1)            | 66.7 (5.1)            | 64.3 (5.9)       |
| <b>Female</b>                   | 5701 (57.2)                 | 2278 (57.0)                           | 2892 (57.2)            | 369 (58.7)            | 85 (63.4)             | 77 (53.1)        |
| <b>African-American</b>         | 2029 (20.4)                 | 1101 (27.5)                           | 792 (15.7)             | 97 (15.4)             | 24 (17.9)             | 15 (10.3)        |
| <b>Education</b>                |                             |                                       |                        |                       |                       |                  |
| <High school                    | 1850 (18.6)                 | 633 (15.8)                            | 993 (19.6)             | 157 (25.0)            | 43 (32.1)             | 24 (16.6)        |
| High school or GED              | 4243 (42.6)                 | 1647 (41.2)                           | 2208 (43.6)            | 259 (41.2)            | 59 (44.0)             | 70 (48.3)        |
| >High school                    | 3874 (38.9)                 | 1720 (43.0)                           | 1858 (36.7)            | 213 (33.9)            | 32 (23.9)             | 51 (35.2)        |
| <b>Smoking</b>                  |                             |                                       |                        |                       |                       |                  |
| Current                         | 1413 (14.2)                 | 465 (11.7)                            | 788 (15.6)             | 104 (16.6)            | 23 (17.3)             | 33 (22.9)        |
| Former                          | 4312 (43.5)                 | 1792 (45.0)                           | 2123 (42.1)            | 282 (44.9)            | 51 (38.3)             | 64 (44.4)        |
| Never                           | 4195 (42.3)                 | 1722 (43.3)                           | 2125 (42.2)            | 242 (38.5)            | 59 (44.4)             | 47 (32.6)        |
| <b>Apolipoprotein E4 status</b> |                             |                                       |                        |                       |                       |                  |
| TT = 0 Alleles                  | 6743 (69.9)                 | 2620 (67.7)                           | 3481 (71.1)            | 449 (73.8)            | 96 (73.3)             | 97 (69.3)        |
| CT = 1 Allele                   | 2651 (27.5)                 | 1146 (29.6)                           | 1290 (26.4)            | 143 (23.5)            | 31 (23.7)             | 41 (29.3)        |
| CC = 2 Alleles                  | 247 (2.6)                   | 103 (2.7)                             | 122 (2.5)              | 16 (2.6)              | 4 (3.1)               | 2 (1.4)          |

|                                                                                                |                   |                    |                   |                   |                   |                  |
|------------------------------------------------------------------------------------------------|-------------------|--------------------|-------------------|-------------------|-------------------|------------------|
| <b>Body mass index (BMI), kg/m<sup>2</sup></b>                                                 |                   |                    |                   |                   |                   |                  |
| Underweight (<18.5)                                                                            | 73 (0.7)          | 44 (1.1)           | 26 (0.5)          | 1 (0.2)           | 0 (0.0)           | 2 (1.4)          |
| Normal weight (18.5 – 25)                                                                      | 2523 (25.3)       | 1226 (30.6)        | 1116 (22.1)       | 116 (18.4)        | 25 (18.7)         | 40 (27.6)        |
| Overweight (25 – 30)                                                                           | 3934 (39.5)       | 1633 (40.8)        | 1969 (38.9)       | 233 (37.0)        | 50 (37.3)         | 49 (33.8)        |
| Obese (>30)                                                                                    | 3437 (34.5)       | 1097 (27.4)        | 1948 (38.5)       | 279 (44.4)        | 59 (44.0)         | 54 (37.2)        |
| <b>Diabetes</b>                                                                                | 1543 (15.5)       | 635 (16.0)         | 709 (14.1)        | 127 (20.2)        | 44 (32.8)         | 28 (19.4)        |
| <b>Systolic blood pressure, mmHg, mean (SD)</b>                                                | 133.9 (21.2)      | 132.6 (20.4)       | 134.4 (21.2)      | 137.2 (25.0)      | 137.9 (23.5)      | 139.6 (19.0)     |
| <b>Antihypertensive medication</b>                                                             | 4165 (41.8)       | 1354 (33.9)        | 2210 (43.7)       | 418 (66.5)        | 111 (82.8)        | 72 (49.7)        |
| <b>C-reactive protein (CRP), mg/l, median (IQR)</b>                                            | 2.4 (1.1, 5.4)    | 2.5 (1.1, 5.7)     | 2.2 (1.0, 5.0)    | 3.1 (1.3, 6.3)    | 3.6 (1.6, 7.8)    | 7.9 (2.4, 10.8)  |
| <i>Measures of kidney function</i>                                                             |                   |                    |                   |                   |                   |                  |
| <b>Estimated Glomerular Filtration Rate (eGFR), ml/min per 1.73m<sup>2</sup>, median (IQR)</b> |                   |                    |                   |                   |                   |                  |
| CKD-EPI, Creatinine                                                                            | 89.2 (76.7, 96.2) | 94.7 (88.1, 101.6) | 85.3 (74.3, 92.9) | 68.4 (59.5, 81.6) | 52.1 (43.9, 63.4) | 25.9 (7.6, 28.2) |
| CKD-EPI, Cystatin-C                                                                            | 85.2 (73.0, 97.3) | 99.5 (95.0, 104.4) | 78.0 (71.1, 83.9) | 55.0 (51.0, 58.0) | 39.3 (36.3, 42.4) | 25.9 (6.2, 30.5) |
| CKD-EPI, Creatinine + Cystatin-C                                                               | 87.3 (76.6, 97.1) | 99.0 (93.7, 105.1) | 81.4 (74.7, 87.6) | 61.6 (55.8, 66.8) | 45.7 (40.3, 49.6) | 25.3 (6.4, 28.2) |
| CKD-EPI, Beta-2-Microglobulin                                                                  | 75.3 (66.4, 84.6) | 85.1 (78.4, 92.6)  | 70.7 (64.5, 76.6) | 55.2 (49.2, 61.6) | 42.4 (37.1, 48.7) | 22.4 (6.7, 27.7) |



|                                                                                    |                |                |                |                 |                 |                 |
|------------------------------------------------------------------------------------|----------------|----------------|----------------|-----------------|-----------------|-----------------|
| <b>Urine albumin-to-creatinine ratio (UACR),<br/>mg/g Creatinine, median (IQR)</b> | 3.7 (1.8, 7.5) | 3.5 (1.6, 6.7) | 3.7 (1.8, 7.4) | 4.7 (2.0, 13.3) | 4.9 (2.9, 14.8) | 7.1 (3.4, 43.2) |
|------------------------------------------------------------------------------------|----------------|----------------|----------------|-----------------|-----------------|-----------------|

Data are presented as number (%) unless otherwise specified.

**Table S3:** Characteristics of the study population at baseline visit 4 (1996-1998) stratified by UACR categories, the Atherosclerosis Risk in Communities (ARIC) Study cohort.

| Participants                    | Complete cohort | UACR categories (mg/g) |                      |                   |
|---------------------------------|-----------------|------------------------|----------------------|-------------------|
|                                 | N = 9967        | UACR < 30<br>9255      | UACR 30 – 300<br>602 | UACR > 300<br>110 |
| <b>Age, years, mean (SD)</b>    | 62.8 (5.7)      | 62.7 (5.6)             | 64.3 (5.7)           | 65.2 (6.3)        |
| <b>Female</b>                   | 5701 (57.2)     | 5325 (57.5)            | 321 (53.3)           | 55 (50.0)         |
| <b>African-American</b>         | 2029 (20.4)     | 1794 (19.4)            | 195 (32.4)           | 40 (36.4)         |
| <b>Education</b>                |                 |                        |                      |                   |
| <High school                    | 1850 (18.6)     | 1648 (17.8)            | 171 (28.4)           | 31 (28.2)         |
| High school or GED              | 4243 (42.6)     | 3959 (42.8)            | 236 (39.2)           | 48 (43.6)         |
| >High school                    | 3874 (38.9)     | 3648 (39.4)            | 195 (32.4)           | 31 (28.2)         |
| <b>Smoking</b>                  |                 |                        |                      |                   |
| Current                         | 1413 (14.2)     | 1270 (13.8)            | 124 (20.9)           | 19 (17.4)         |
| Former                          | 4312 (43.5)     | 4007 (43.5)            | 253 (42.6)           | 52 (47.7)         |
| Never                           | 4195 (42.3)     | 3940 (42.7)            | 217 (36.5)           | 38 (34.9)         |
| <b>Apolipoprotein E4 status</b> |                 |                        |                      |                   |
| TT = 0 Alleles                  | 6743 (69.9)     | 6267 (70.0)            | 400 (68.3)           | 76 (73.1)         |
| CT = 1 Allele                   | 2651 (27.5)     | 2457 (27.4)            | 168 (28.7)           | 26 (25.0)         |
| CC = 2 Alleles                  | 247 (2.6)       | 227 (2.5)              | 18 (3.1)             | 2 (1.9)           |

|                                                                                                |                   |                   |                    |                      |
|------------------------------------------------------------------------------------------------|-------------------|-------------------|--------------------|----------------------|
| <b>Body mass index (BMI), kg/m<sup>2</sup></b>                                                 |                   |                   |                    |                      |
| Underweight (<18.5)                                                                            | 73 (0.7)          | 61 (0.7)          | 12 (2.0)           | 0 (0.0)              |
| Normal weight (18.5 – 25)                                                                      | 2523 (25.3)       | 2369 (25.6)       | 133 (22.1)         | 21 (19.1)            |
| Overweight (25 – 30)                                                                           | 3934 (39.5)       | 3690 (39.9)       | 203 (33.7)         | 41 (37.3)            |
| Obese (>30)                                                                                    | 3437 (34.5)       | 3135 (33.9)       | 254 (42.2)         | 48 (43.6)            |
| <b>Diabetes</b>                                                                                | 1543 (15.5)       | 1263 (13.7)       | 218 (36.6)         | 62 (56.9)            |
| <b>Systolic blood pressure, mmHg, mean (SD)</b>                                                | 133.9 (21.2)      | 132.8 (20.4)      | 147.2 (25.3)       | 155.7 (25.3)         |
| <b>Antihypertensive medication</b>                                                             | 4165 (41.8)       | 3685 (39.8)       | 385 (64.0)         | 95 (86.4)            |
| <b>C-reactive protein (CRP), mg/l, median (IQR)</b>                                            | 2.4 (1.1, 5.4)    | 2.3 (1.0, 5.3)    | 3.4 (1.5, 6.9)     | 4.8 (1.8, 9.6)       |
| <i>Measures of kidney function</i>                                                             |                   |                   |                    |                      |
| <b>Estimated Glomerular Filtration Rate (eGFR), ml/min per 1.73m<sup>2</sup>, median (IQR)</b> |                   |                   |                    |                      |
| CKD-EPI, Creatinine                                                                            | 89.2 (76.7, 96.2) | 89.3 (77.1, 96.1) | 87.3 (73.1, 97.0)  | 76.7 (57.2, 95.6)    |
| CKD-EPI, Cystatin-C                                                                            | 85.2 (73.0, 97.3) | 85.8 (73.8, 97.4) | 79.5 (65.8, 93.8)  | 65.2 (47.4, 83.5)    |
| CKD-EPI, Creatinine + Cystatin-C                                                               | 87.3 (76.6, 97.1) | 87.6 (77.2, 97.1) | 83.8 (70.4, 95.9)  | 73.6 (50.8, 90.5)    |
| CKD-EPI, Beta-2-Microglobulin                                                                  | 75.3 (66.4, 84.6) | 75.6 (66.9, 84.6) | 71.0 (58.9, 82.2)  | 58.7 (47.5, 72.5)    |
| <b>Urine albumin-to-creatinine ratio (UACR), mg/g Creatinine, median (IQR)</b>                 | 3.7 (1.8, 7.5)    | 3.4 (1.6, 6.3)    | 59.6 (41.2, 106.3) | 594.0 (407.0, 996.2) |

Data are presented as number (%) unless otherwise specified.

**Table S4:** Characteristics of the study population at baseline visit 5 (2011-2013) stratified by eGFR (cystatin-C) categories, the Atherosclerosis Risk in Communities (ARIC) Study cohort.

| Participants                    | Complete cohort<br>N = 4626 | eGFR (Cystatin-C) categories (ml/min) |                |                |                |            |
|---------------------------------|-----------------------------|---------------------------------------|----------------|----------------|----------------|------------|
|                                 |                             | eGFR ≥ 90                             | 90 > eGFR ≥ 60 | 60 > eGFR ≥ 45 | 45 > eGFR ≥ 30 | 30 > eGFR  |
|                                 |                             | 376                                   | 2023           | 1289           | 738            | 200        |
| <b>Age, years, mean (SD)</b>    | 75.5 (5.2)                  | 72.5 (3.8)                            | 74.3 (4.6)     | 76.4 (5.2)     | 77.8 (5.3)     | 78.5 (5.6) |
| <b>Female</b>                   | 2637 (57.0)                 | 199 (52.9)                            | 1090 (53.9)    | 784 (60.8)     | 438 (59.3)     | 126 (63.0) |
| <b>African-American</b>         | 1003 (21.7)                 | 127 (33.8)                            | 449 (22.2)     | 259 (20.1)     | 128 (17.3)     | 40 (20.0)  |
| <b>Education</b>                |                             |                                       |                |                |                |            |
| <High school                    | 599 (12.9)                  | 32 (8.5)                              | 217 (10.7)     | 176 (13.7)     | 138 (18.7)     | 36 (18.0)  |
| High school or GED              | 1908 (41.2)                 | 128 (34.0)                            | 808 (39.9)     | 574 (44.5)     | 320 (43.4)     | 78 (39.0)  |
| >High school                    | 2119 (45.8)                 | 216 (57.4)                            | 998 (49.3)     | 539 (41.8)     | 280 (37.9)     | 86 (43.0)  |
| <b>Smoking</b>                  |                             |                                       |                |                |                |            |
| Current                         | 256 (5.7)                   | 16 (4.4)                              | 115 (5.8)      | 86 (6.8)       | 29 (4.1)       | 10 (5.1)   |
| Former                          | 2165 (47.9)                 | 188 (51.5)                            | 959 (48.1)     | 592 (47.0)     | 343 (48.7)     | 82 (41.8)  |
| Never                           | 1708 (37.8)                 | 126 (34.5)                            | 765 (38.4)     | 464 (36.9)     | 268 (38.0)     | 85 (43.4)  |
| <b>Apolipoprotein E4 status</b> |                             |                                       |                |                |                |            |
| TT = 0 Alleles                  | 3236 (72.2)                 | 235 (64.9)                            | 1376 (70.3)    | 940 (75.0)     | 549 (76.3)     | 136 (71.2) |
| CT = 1 Allele                   | 1167 (26.1)                 | 116 (32.0)                            | 542 (27.7)     | 300 (23.9)     | 160 (22.2)     | 49 (25.7)  |
| CC = 2 Alleles                  | 80 (1.8)                    | 11 (3.0)                              | 39 (2.0)       | 13 (1.0)       | 11 (1.5)       | 6 (3.1)    |

|                                                                                                |                   |                    |                   |                   |                   |                   |
|------------------------------------------------------------------------------------------------|-------------------|--------------------|-------------------|-------------------|-------------------|-------------------|
| <b>Body mass index (BMI), kg/m<sup>2</sup></b>                                                 |                   |                    |                   |                   |                   |                   |
| Underweight (<18.5)                                                                            | 45 (1.0)          | 8 (2.1)            | 24 (1.2)          | 9 (0.7)           | 1 (0.1)           | 3 (1.5)           |
| Normal weight (18.5 – 25)                                                                      | 1091 (23.5)       | 114 (30.3)         | 534 (26.4)        | 277 (21.5)        | 132 (17.9)        | 34 (17.0)         |
| Overweight (25 – 30)                                                                           | 1793 (38.8)       | 163 (43.4)         | 808 (39.9)        | 487 (37.8)        | 267 (36.2)        | 68 (34.0)         |
| Obese (>30)                                                                                    | 1697 (36.7)       | 91 (24.2)          | 657 (32.5)        | 516 (40.0)        | 338 (45.8)        | 95 (47.5)         |
| <b>Diabetes</b>                                                                                | 1459 (32.3)       | 110 (29.6)         | 558 (28.1)        | 413 (32.9)        | 281 (39.7)        | 97 (50.0)         |
| <b>Systolic blood pressure, mmHg, mean (SD)</b>                                                | 130.5 (18.1)      | 128.6 (17.9)       | 130.4 (16.9)      | 131.4 (18.5)      | 129.6 (18.8)      | 131.5 (23.6)      |
| <b>Antihypertensive medication</b>                                                             | 3470 (75.1)       | 230 (61.3)         | 1387 (68.6)       | 1011 (78.5)       | 655 (89.0)        | 187 (94.0)        |
| <b>C-reactive protein (CRP), mg/l, median (IQR)</b>                                            | 2.0 (1.0 – 4.2)   | 1.3 (0.7, 2.7)     | 1.7 (0.8, 3.6)    | 2.4 (1.1, 4.8)    | 2.5 (1.3, 5.6)    | 3.6 (1.9, 6.4)    |
| <i>Measures of kidney function</i>                                                             |                   |                    |                   |                   |                   |                   |
| <b>Estimated Glomerular Filtration Rate (eGFR), ml/min per 1.73m<sup>2</sup>, median (IQR)</b> |                   |                    |                   |                   |                   |                   |
| CKD-EPI, Creatinine                                                                            | 70.9 (58.2, 83.0) | 88.4 (81.9, 94.6)  | 78.6 (69.2, 86.0) | 65.8 (57.5, 75.0) | 52.4 (45.3, 61.0) | 36.0 (29.4, 41.5) |
| CKD-EPI, Cystatin-C                                                                            | 60.9 (47.9, 74.7) | 96.0 (93.2, 100.5) | 71.2 (65.3, 78.8) | 53.1 (49.3, 56.6) | 39.4 (35.6, 42.4) | 25.9 (21.7, 28.2) |
| CKD-EPI, Creatinine + Cystatin-C                                                               | 66.1 (53.8, 78.3) | 94.9 (90.4, 100.0) | 75.7 (69.5, 82.1) | 59.0 (54.3, 64.2) | 44.9 (40.2, 49.3) | 29.8 (25.4, 32.9) |
| CKD-EPI, Beta-2-Microglobulin                                                                  | 64.0 (54.0, 73.4) | 85.5 (78.7, 91.6)  | 71.0 (65.4, 77.0) | 58.9 (54.3, 64.0) | 47.1 (42.6, 52.2) | 33.4 (29.0, 37.4) |

|                                                                                    |                  |                 |                 |                  |                  |                    |
|------------------------------------------------------------------------------------|------------------|-----------------|-----------------|------------------|------------------|--------------------|
| <b>Urine albumin-to-creatinine ratio (UACR),<br/>mg/g Creatinine, median (IQR)</b> | 10.3 (6.3, 21.7) | 9.5 (6.3, 16.7) | 9.2 (5.9, 17.0) | 10.1 (6.0, 22.2) | 13.9 (7.1, 35.1) | 31.1 (11.8, 100.5) |
|------------------------------------------------------------------------------------|------------------|-----------------|-----------------|------------------|------------------|--------------------|

Data are presented as number (%) unless otherwise specified.

**Table S5:** Characteristics of the study population at baseline visit 5 (2011-2013) stratified by UACR categories, the Atherosclerosis Risk in Communities (ARIC) Study cohort.

| Participants                    | Complete cohort<br>N = 4626 | UACR categories (mg/g) |                      |                   |
|---------------------------------|-----------------------------|------------------------|----------------------|-------------------|
|                                 |                             | UACR < 30<br>3766      | UACR 30 – 300<br>752 | UACR > 300<br>108 |
| <b>Age, years, mean (SD)</b>    | 75.5 (5.2)                  | 75.1 (5.0)             | 77.0 (5.4)           | 77.0 (5.5)        |
| <b>Female</b>                   | 2637 (57.0)                 | 2190 (58.2)            | 399 (53.1)           | 48 (44.4)         |
| <b>African-American</b>         | 1003 (21.7)                 | 775 (20.6)             | 189 (25.1)           | 39 (36.1)         |
| <b>Education</b>                |                             |                        |                      |                   |
| <High school                    | 599 (12.9)                  | 450 (11.9)             | 124 (16.5)           | 25 (23.1)         |
| High school or GED              | 1908 (41.2)                 | 1562 (41.5)            | 305 (40.6)           | 41 (38.0)         |
| >High school                    | 2119 (45.8)                 | 1754 (46.6)            | 323 (43.0)           | 42 (38.9)         |
| <b>Smoking</b>                  |                             |                        |                      |                   |
| Current                         | 256 (5.7)                   | 194 (5.3)              | 56 (7.7)             | 6 (5.8)           |
| Former                          | 2165 (47.9)                 | 1759 (47.7)            | 359 (49.1)           | 46 (44.7)         |
| Never                           | 1708 (37.8)                 | 1421 (38.6)            | 253 (34.6)           | 34 (33.0)         |
| <b>Apolipoprotein E4 status</b> |                             |                        |                      |                   |
| TT = 0 Alleles                  | 3236 (72.2)                 | 2618 (71.8)            | 544 (74.3)           | 74 (71.2)         |
| CT = 1 Allele                   | 1167 (26.1)                 | 962 (26.4)             | 177 (24.2)           | 28 (26.9)         |
| CC = 2 Alleles                  | 80 (1.8)                    | 67 (1.8)               | 11 (1.5)             | 2 (1.9)           |

|                                                                                                |                   |                   |                   |                       |
|------------------------------------------------------------------------------------------------|-------------------|-------------------|-------------------|-----------------------|
| <b>Body mass index (BMI), kg/m<sup>2</sup></b>                                                 |                   |                   |                   |                       |
| Underweight (<18.5)                                                                            | 45 (1.0)          | 33 (0.9)          | 12 (1.6)          | 0 (0.0)               |
| Normal weight (18.5 – 25)                                                                      | 1091 (23.5)       | 908 (24.1)        | 167 (22.2)        | 16 (14.8)             |
| Overweight (25 – 30)                                                                           | 1793 (38.8)       | 1487 (39.5)       | 272 (36.2)        | 34 (31.5)             |
| Obese (>30)                                                                                    | 1697 (36.7)       | 1338 (35.5)       | 301 (40.0)        | 58 (53.7)             |
| <b>Diabetes</b>                                                                                | 1459 (32.3)       | 1069 (29.1)       | 318 (43.5)        | 72 (67.3)             |
| <b>Systolic blood pressure, mmHg, mean (SD)</b>                                                | 130.5 (18.1)      | 129.0 (17.2)      | 135.7 (20.0)      | 144.5 (22.3)          |
| <b>Antihypertensive medication</b>                                                             | 3470 (75.1)       | 2739 (72.8)       | 627 (83.6)        | 104 (96.3)            |
| <b>C-reactive protein (CRP), mg/l, median (IQR)</b>                                            | 2.0 (1.0 – 4.2)   | 1.9 (0.9, 4.1)    | 2.4 (1.1, 5.0)    | 3.1 (1.4, 5.9)        |
| <i>Measures of kidney function</i>                                                             |                   |                   |                   |                       |
| <b>Estimated Glomerular Filtration Rate (eGFR), ml/min per 1.73m<sup>2</sup>, median (IQR)</b> |                   |                   |                   |                       |
| CKD-EPI, Creatinine                                                                            | 70.9 (58.2, 83.0) | 71.8 (60.1, 83.4) | 66.9 (51.3, 81.1) | 50.7 (36.2, 67.0)     |
| CKD-EPI, Cystatin-C                                                                            | 60.9 (47.9, 74.7) | 62.8 (50.4, 76.1) | 53.1 (41.0, 68.0) | 39.4 (28.2, 52.1)     |
| CKD-EPI, Creatinine + Cystatin-C                                                               | 66.1 (53.8, 78.3) | 67.6 (56.1, 79.3) | 60.0 (46.9, 74.3) | 45.0 (32.3, 57.7)     |
| CKD-EPI, Beta-2-Microglobulin                                                                  | 64.0 (54.0, 73.4) | 65.2 (55.8, 74.3) | 57.8 (46.9, 68.1) | 46.4 (35.8, 57.0)     |
| <b>Urine albumin-to-creatinine ratio (UACR), mg/g Creatinine, median (IQR)</b>                 | 10.3 (6.3, 21.7)  | 8.3 (5.8, 13.6)   | 56.0 (38.9, 93.9) | 620.1 (379.8, 1343.9) |

Data are presented as number (%) unless otherwise specified.



**Table S6:** Adjusted hazard ratios of dementia incidence (95%-CI) after midlife (baseline visit 4, ages 54-74 years during 1996-1998) and after older age (baseline visit 5, ages 70-90 years during 2011-2013), for linear splines of eGFR measures with a knot at 60 ml/min, the Atherosclerosis Risk in Communities (ARIC) Study cohort.

| eGFR                                                                                                                                                    | Baseline visit 4,<br>ages 54-74 years                         | Baseline visit 5,<br>ages 70-90 years                  |
|---------------------------------------------------------------------------------------------------------------------------------------------------------|---------------------------------------------------------------|--------------------------------------------------------|
| <b>eGFR CKD-EPI, Creatinine</b><br>per V4-IQR (19.4ml/min) decrease, linear spline<br>< 60<br>≥ 60<br>p-value for spline term difference                | 1.38 (0.93–2.05)<br>0.95 (0.89–1.02)<br>0.267                 | 1.14 (0.87–1.51)<br>1.01 (0.82–1.23)<br>0.390          |
| <b>eGFR CKD-EPI, Cystatin-C</b><br>per V4-IQR (24.3ml/min) decrease, linear spline<br>< 60<br>≥ 60<br>p-value for spline term difference                | <b>1.37 (1.08–1.73)*</b><br>1.07 (0.97–1.18)*<br>0.151        | <b>1.39 (1.03–1.89)*</b><br>1.23 (0.95–1.60)<br>0.861  |
| <b>eGFR CKD-EPI, Creatinine and Cystatin-C</b><br>per V4-IQR (20.7ml/min) decrease, linear spline<br>< 60<br>≥ 60<br>p-value for spline term difference | <b>1.47 (1.05–2.04)*</b><br>1.03 (0.95–1.12)<br>0.121         | <b>1.28 (1.01–1.61)*</b><br>1.09 (0.84–1.40)<br>0.529  |
| <b>eGFR CKD-EPI, Beta-2-Microglobulin</b><br>per V4-IQR (18.3ml/min) decrease, linear spline<br>< 60<br>≥ 60<br>p-value for spline term difference      | <b>1.42 (1.25–1.78)*</b><br><b>1.11 (1.02–1.21)*</b><br>0.285 | <b>1.49 (1.13–1.97)*</b><br>1.23 (0.96–1.56)*<br>0.315 |

Models adjusted for age, sex, race, education level, Apolipoprotein E4 level, smoking, body mass index, diabetes, antihypertensive medication and log-UACR. B2M additionally adjusted for CRP.

\***p < 0.05**

**Table S7:** Adjusted relative hazards (95%-CI) of dementia incidence after midlife (baseline visit 4, ages 54-74 years during 1996-1998) and after older age (baseline visit 5, ages 70-90 years during 2011-2013), by eGFR (cystatin-C) categories, the Atherosclerosis Risk in Communities (ARIC) Study cohort.

|                                                             | eGFR (Cystatin-C) categories (ml/min) |                  |                          |                          |                           |
|-------------------------------------------------------------|---------------------------------------|------------------|--------------------------|--------------------------|---------------------------|
|                                                             | eGFR ≥ 90                             | 90 > eGFR ≥ 60   | 60 > eGFR ≥ 45           | 45 > eGFR ≥ 30           | 30 > eGFR                 |
| <b>Incident dementia after visit 4,<br/>age 54-74 years</b> |                                       |                  |                          |                          |                           |
| eGFR CKD-EPI,<br>Creatinine                                 | reference                             | 0.91 (0.81-1.01) | 1.02 (0.83-1.27)         | 0.91 (0.51-1.62)         | <b>5.89 (1.46-23.76)*</b> |
| eGFR CKD-EPI,<br>Cystatin-C                                 | reference                             | 1.11 (0.99-1.24) | <b>1.28 (1.05-1.57)*</b> | <b>1.76 (1.22-2.54)*</b> | <b>1.74 (1.11-2.72)*</b>  |
| eGFR CKD-EPI,<br>Creatinine and<br>Cystatin-C               | reference                             | 1.02 (0.92-1.14) | <b>1.38 (1.11-1.72)*</b> | 0.96 (0.61-1.50)         | <b>5.42 (1.33-22.08)*</b> |
| eGFR CKD-EPI, Beta-<br>2-Microglobulin                      | reference                             | 1.05 (0.91-1.22) | <b>1.27 (1.04-1.56)*</b> | <b>1.53 (1.08-2.17)*</b> | <b>3.80 (1.21-11.98)*</b> |
| <b>Incident dementia after visit 5,<br/>age 70-90 years</b> |                                       |                  |                          |                          |                           |
| eGFR CKD-EPI,<br>Creatinine                                 | reference                             | 0.96 (0.65-1.43) | 1.08 (0.71-1.66)         | 1.07 (0.64-1.77)         | 1.49 (0.67-3.29)          |
| eGFR CKD-EPI,<br>Cystatin-C                                 | reference                             | 1.36 (0.83-2.24) | <b>1.83 (1.10-3.04)*</b> | <b>1.92 (1.12-3.28)*</b> | <b>2.40 (1.29-4.43)</b>   |
| eGFR CKD-EPI,<br>Creatinine and<br>Cystatin-C               | reference                             | 1.14 (0.74-1.77) | 1.47 (0.93-2.32)         | 1.08 (0.64-1.83)         | <b>2.17 (1.15-4.10)*</b>  |

|                                                    |           |                  |                  |                  |                          |
|----------------------------------------------------|-----------|------------------|------------------|------------------|--------------------------|
| <b>eGFR CKD-EPI,<br/>Beta-2-<br/>Microglobulin</b> | reference | 1.40 (0.71-2.76) | 1.87 (0.94-3.75) | 1.83 (0.88-3.82) | <b>3.06 (1.19-7.89)*</b> |
|----------------------------------------------------|-----------|------------------|------------------|------------------|--------------------------|

Models adjusted for age, sex, race, education level, Apolipoprotein E4 level, smoking, body mass index, diabetes, antihypertensive medication and log-UACR.

**\*p < 0.05**

**Table S8:** Adjusted relative hazards (95%-CI) of dementia incidence after midlife (baseline visit 4, ages 54-74 years during 1996-1998) and after older age (baseline visit 5, ages 70-90 years during 2011-2013), by UACR categories, the Atherosclerosis Risk in Communities (ARIC) Study cohort.

|                                                             | UACR categories (mg/g) |                          |                          |
|-------------------------------------------------------------|------------------------|--------------------------|--------------------------|
|                                                             | < 30                   | 30 – 300                 | > 300                    |
| <b>Incident dementia after visit 4,<br/>age 54-74 years</b> |                        |                          |                          |
|                                                             | reference              | <b>1.28 (1.05-1.53)*</b> | <b>3.44 (2.33-5.08)*</b> |
| <b>Incident dementia after visit 5,<br/>age 70-90 years</b> |                        |                          |                          |
|                                                             | reference              | 1.27 (0.99-1.63)         | <b>1.93 (1.20-3.11)*</b> |

Models adjusted for age, sex, race, education level, Apolipoprotein E4 level, smoking, body mass index, diabetes, antihypertensive medication and eGFR (Cystatin-C).

\*p < 0.05

**Table S9:** Adjusted hazard ratios of dementia incidence (95%-CI) after midlife (baseline visit 4, ages 54-74 years during 1996-1998) and after older age (baseline visit 5, ages 70-90 years during 2011-2013), by eGFR (creatinine) and significant covariates, the Atherosclerosis Risk in Communities (ARIC) Study cohort.

|                                                                     | Baseline visit 4, ages 54-74 years |                          | Baseline visit 5, ages 70-90 years |                          |
|---------------------------------------------------------------------|------------------------------------|--------------------------|------------------------------------|--------------------------|
|                                                                     | Model 1                            | Model 2                  | Model 1                            | Model 2                  |
| <b>eGFR CKD-EPI, Creatinine</b><br>per V4-IQR (19.4ml/min) decrease | 0.98 (0.92 – 1.04)                 | 0.98 (0.91 – 1.04)       | 1.11 (0.99 - 1.24)                 | 1.03 (0.91 – 1.17)       |
| <b>Education level</b>                                              |                                    |                          |                                    |                          |
| <Highschool                                                         | <b>1.58 (1.38 – 1.79)*</b>         | <b>2.01 (1.51-2.67)*</b> | <b>1.82 (1.38 – 2.40)*</b>         | <b>1.59 (1.40-1.80)*</b> |
| Highschool or GED                                                   | <b>1.22 (1.09 – 1.37)*</b>         | <b>1.34 (1.05-1.70)*</b> | <b>1.29 (1.03 – 1.62)*</b>         | <b>1.19 (1.07-1.33)*</b> |
| >Highschool                                                         | reference                          | reference                | reference                          | reference                |
| <b>Apolipoprotein E4 Gen</b>                                        |                                    |                          |                                    |                          |
| TT = 0 Alleles                                                      | reference                          | reference                | reference                          | reference                |
| CT = 1 Allele                                                       | <b>1.91 (1.73 – 2.11)*</b>         | <b>1.55 (1.24-1.94)*</b> | <b>1.63 (1.33 – 2.01)*</b>         | <b>1.96 (1.78-2.16)*</b> |
| CC = 2 Alleles                                                      | <b>4.10 (3.37 – 4.99)*</b>         | <b>2.36 (1.34-4.17)*</b> | <b>2.05 (1.19 – 3.53)*</b>         | <b>4.04 (3.33-4.90)*</b> |
| <b>Body mass index</b>                                              |                                    |                          |                                    |                          |
| Underweight (<18.5)                                                 | -                                  | <b>1.99 (1.27-3.12)*</b> | -                                  | <b>2.74 (1.45-5.16)*</b> |
| Normal weight (18.5 – 25)                                           | -                                  | reference                | -                                  | reference                |
| Overweight (25 – 30)                                                | -                                  | 1.01 (0.89-1.14)         | -                                  | <b>0.73 (0.56-0.95)*</b> |
| Obese (>30)                                                         | -                                  | 1.08 (0.95-1.23)         | -                                  | <b>0.68 (0.50-0.91)*</b> |
| <b>Diabetes</b>                                                     | -                                  | <b>1.46 (1.29-1.65)*</b> | -                                  | 1.14 (0.90-1.43)         |

|                                    |   |                          |   |                  |
|------------------------------------|---|--------------------------|---|------------------|
| <b>Antihypertensive medication</b> | - | <b>1.13 (1.02-1.24)*</b> | - | 1.15 (0.91-1.45) |
|------------------------------------|---|--------------------------|---|------------------|

Model 1 adjusted for age, sex, race, education level and Apolipoprotein E4 level.

Model 2 adjusted for age, sex, race, education level, Apolipoprotein E4 level, smoking, body mass index, diabetes, antihypertensive medication and log-UACR.

**\*p < 0.05**

**Table S10:** Adjusted hazard ratios (HRs, 95%-CI) of dementia incidence after visit 4 by measures of CKD, the Atherosclerosis Risk in Communities (ARIC) Study cohort. Comparison of HRs with observational period after visit 4 and restricted observational period between visit 4 and visit 5 with right censoring at visit 5.

| Measure of CKD                                                                     | Baseline visit 4, right censored at visit 5 |                          |
|------------------------------------------------------------------------------------|---------------------------------------------|--------------------------|
|                                                                                    | Model 1                                     | Model 2                  |
| <b>eGFR CKD-EPI, Creatinine</b><br>per V4-IQR (19.4ml/min) decrease                | 0.92 (0.85-1.01)                            | 0.94 (0.87-1.02)         |
| <b>eGFR CKD-EPI, Cystatin-C</b><br>per V4-IQR (24.3ml/min) decrease                | <b>1.17 (1.06-1.29)*</b>                    | <b>1.14 (1.04-1.27)*</b> |
| <b>eGFR CKD-EPI, Creatinine and Cystatin-C</b><br>per V4-IQR (20.7ml/min) decrease | 1.06 (0.97-1.16)                            | 1.05 (0.96-1.15)         |
| <b>eGFR CKD-EPI, Beta-2-Microglobulin</b><br>per V4-IQR (18.3ml/min) decrease      | <b>1.22 (1.12-1.32)*</b>                    | <b>1.19 (1.10-1.31)*</b> |
| <b>Log Urine albumin-to-creatinine ratio</b><br>per V4-IQR (4.2) – fold increase   | <b>1.12 (1.06-1.20)*</b>                    | <b>1.09 (1.02-1.16)*</b> |

Model 1 adjusted for age, sex, race, education level and Apolipoprotein E4 level.

Model 2 adjusted for age, sex, race, education level, Apolipoprotein E4 level, smoking, body mass index, diabetes and antihypertensive medication. eGFR values adjusted for log-UACR and log-UACR values adjusted for eGFR (cystatin-C). B2M additionally adjusted for CRP.

**\*p < 0.05**

**Table S11:** Adjusted hazard ratios (95%-CI) of dementia incidence after visit 4 and after visit 5 by measures of CKD, the Atherosclerosis Risk in Communities (ARIC) Study cohort. Subgroup analysis stratified by ethnicity.

| Measure of CKD                                                                     | Baseline visit 4         |                               | Baseline visit 5         |                               |
|------------------------------------------------------------------------------------|--------------------------|-------------------------------|--------------------------|-------------------------------|
|                                                                                    | Caucasian participants   | African-American participants | Caucasian participants   | African American participants |
| <b>eGFR CKD-EPI, Creatinine</b><br>per V4-IQR (19.4ml/min) decrease                | 0.98 (0.88-1.09)         | 0.93 (0.83-1.04)              | 1.02 (0.87-1.19)         | 1.08 (0.89-1.31)              |
| <b>eGFR CKD-EPI, Cystatin-C</b><br>per V4-IQR (24.3ml/min) decrease                | <b>1.17 (1.04-1.31)*</b> | <b>1.21 (1.03-1.42)*</b>      | 1.15 (0.95-1.39)         | <b>1.49 (1.16-1.93)*</b>      |
| <b>eGFR CKD-EPI, Creatinine and Cystatin-C</b><br>per V4-IQR (20.7ml/min) decrease | 1.10 (0.98-1.23)         | 1.06 (0.93-1.21)              | 1.09 (0.92-1.29)         | <b>1.27 (1.03-1.56)*</b>      |
| <b>eGFR CKD-EPI, Beta-2-Microglobulin</b><br>per V4-IQR (18.3ml/min) decrease      | <b>1.18 (1.06-1.31)*</b> | <b>1.25 (1.10-1.43)*</b>      | 1.16 (0.97-1.38)         | <b>1.59 (1.26-2.02)*</b>      |
| <b>Log Urine albumin-to-creatinine ratio</b><br>per V4-IQR (4.2) – fold increase   | <b>1.13 (1.05-1.22)*</b> | 1.07 (0.98-1.17)              | <b>1.28 (1.11-1.47)*</b> | 1.73 (0.97-3.09)              |

Models adjusted for age, sex, education level, Apolipoprotein E4 level, smoking, body mass index, diabetes and antihypertensive medication. eGFR values adjusted for log-UACR and log-UACR values adjusted for eGFR (cystatin-C). B2M additionally adjusted for CRP.

**\*p < 0.05**



**Table S12:** Adjusted hazard ratios (95%-CI) of dementia incidence (according to ascertainment Level 1) after midlife (baseline visit 4, ages 54-74 years during 1996-1998) and after older age (baseline visit 5, ages 70-90 years during 2011-2013), by measures of CKD, the Atherosclerosis Risk in Communities (ARIC) Study cohort.

| Measure of CKD                                                                     | Baseline visit 4,<br>ages 54-74 years | Baseline visit 5,<br>ages 70-90 years |
|------------------------------------------------------------------------------------|---------------------------------------|---------------------------------------|
| <b>eGFR CKD-EPI, Creatinine</b><br>per V4-IQR (19.4ml/min) decrease                | 0.92 (0.81-1.06)                      | 0.92 (0.74-1.14)                      |
| <b>eGFR CKD-EPI, Cystatin-C</b><br>per V4-IQR (24.3ml/min) decrease                | 1.04 (0.89-1.23)                      | 1.05 (0.81-1.36)                      |
| <b>eGFR CKD-EPI, Creatinine and Cystatin-C</b><br>per V4-IQR (20.7ml/min) decrease | 0.99 (0.85-1.14)                      | 1.00 (0.79-1.24)                      |
| <b>eGFR CKD-EPI, Beta-2-Microglobulin</b><br>per V4-IQR (18.3ml/min) decrease      | 1.10 (0.96-1.27)                      | 1.04 (0.82-1.33)                      |
| <b>Log Urine albumin-to-creatinine ratio</b><br>per V4-IQR (4.2) – fold increase   | <b>1.14 (1.03-1.26)*</b>              | 1.60 (0.86-2.98)                      |

Models adjusted for age, sex, race, education level, Apolipoprotein E4 level, smoking, body mass index, diabetes and antihypertensive medication. eGFR values adjusted for log-UACR and log-UACR values adjusted for eGFR (cystatin-C). B2M additionally adjusted for CRP.

\***p < 0.05**

**Table S13:** Adjusted hazard ratios (95%-CI) of dementia incidence after older age (baseline visit 5, ages 70-90 years during 2011-2013), by measures of CKD, the Atherosclerosis Risk in Communities (ARIC) Study cohort. Patients with prevalent mild cognitive impairment (MCI) at visit 5 were excluded.

| Measure of CKD                                                                     | Baseline visit 5         |
|------------------------------------------------------------------------------------|--------------------------|
| <b>eGFR CKD-EPI, Creatinine</b><br>per V4-IQR (19.4ml/min) decrease                | 1.06 (0.89-1.26)         |
| <b>eGFR CKD-EPI, Cystatin-C</b><br>per V4-IQR (24.3ml/min) decrease                | <b>1.42 (1.14-1.76)*</b> |
| <b>eGFR CKD-EPI, Creatinine and Cystatin-C</b><br>per V4-IQR (20.7ml/min) decrease | <b>1.24 (1.03-1.49)*</b> |
| <b>eGFR CKD-EPI, Beta-2-Microglobulin</b><br>per V4-IQR (18.3ml/min) decrease      | <b>1.45 (1.18-1.77)*</b> |
| <b>Log Urine albumin-to-creatinine ratio</b><br>per V4-IQR (4.2) – fold increase   | <b>2.70 (1.69-4.34)*</b> |

Models adjusted for age, sex, race, education level, Apolipoprotein E4 level, smoking, body mass index, diabetes and antihypertensive medication. eGFR values adjusted for log-UACR and log-UACR values adjusted for eGFR (cystatin C). B2M additionally adjusted for CRP. Baseline visit 5: N = 3,622 patients, 206 events / 16,256 person-years;

**\*p < 0.05**
